# Supplementary material for: Enabling triferroics coupling in breathing kagome lattice Nb3X8 (X = Cl, Br, I) monolayers
Source: Royal Society of Chemistry journal article supplement (doi:10.1039/d3tc00560g), 2023-01-01
Supplement: d3tc00560g1.pdf [file d3tc00560g1.pdf]

Supplementary materials for  
Enabling triferroics coupling in breathing kagome  
lattice  $\text{Nb}_3\text{X}_8$  ( $\text{X} = \text{Cl}, \text{Br}, \text{I}$ ) monolayers

Yulin Feng<sup>a</sup> and Qing Yang<sup>\*,b</sup>

<sup>a</sup>College of Physics and Electronic Science, Hubei Normal University, Huangshi 435002, China

<sup>b</sup>Beijing National Laboratory for Condensed Matter Physics and Institute of Physics, Chinese Academy of Sciences, Beijing 100190, China

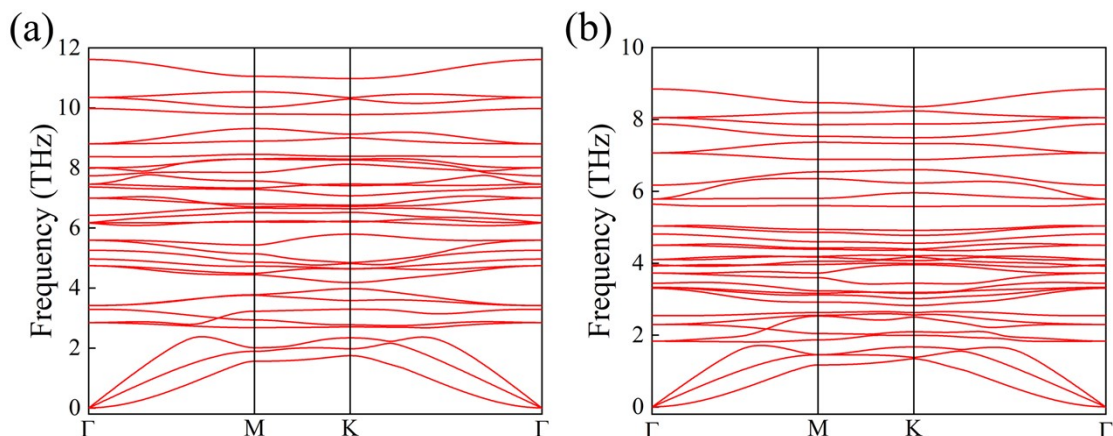

**Fig. S1** Phonon dispersion spectrums for the State I and State II of (a)  $\text{Nb}_3\text{Cl}_8$  and (b)  $\text{Nb}_3\text{Br}_8$  monolayers.

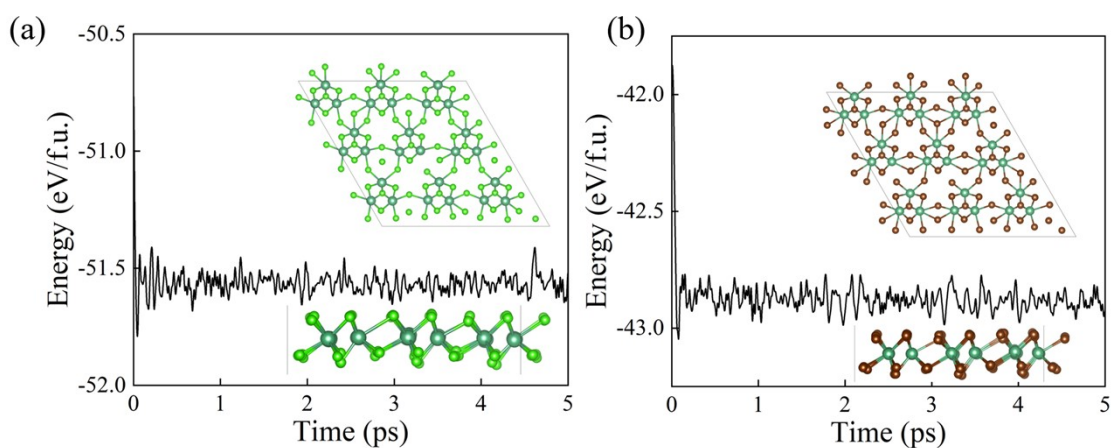

**Fig. S2** AIMD simulations of (a)  $\text{Nb}_3\text{Cl}_8$  and (b)  $\text{Nb}_3\text{Br}_8$  monolayers. The top and side views of final structure are in the picture.

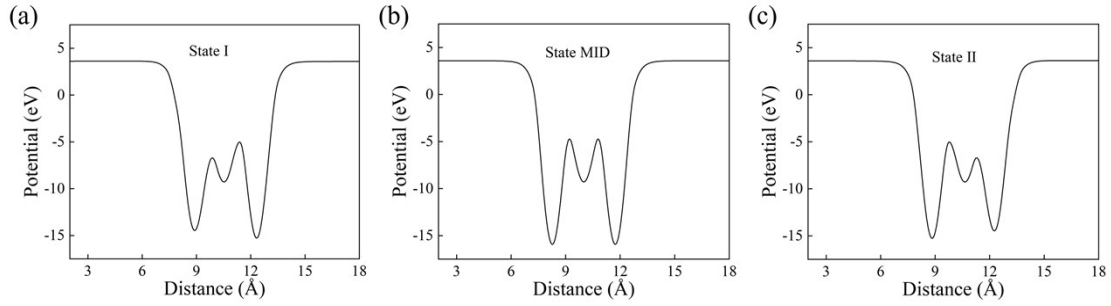

**Fig. S3** Work functions along the  $z$  axis of ferroelectric and paraelectric phases: (a) State I; (b) State MID; (c) State II.

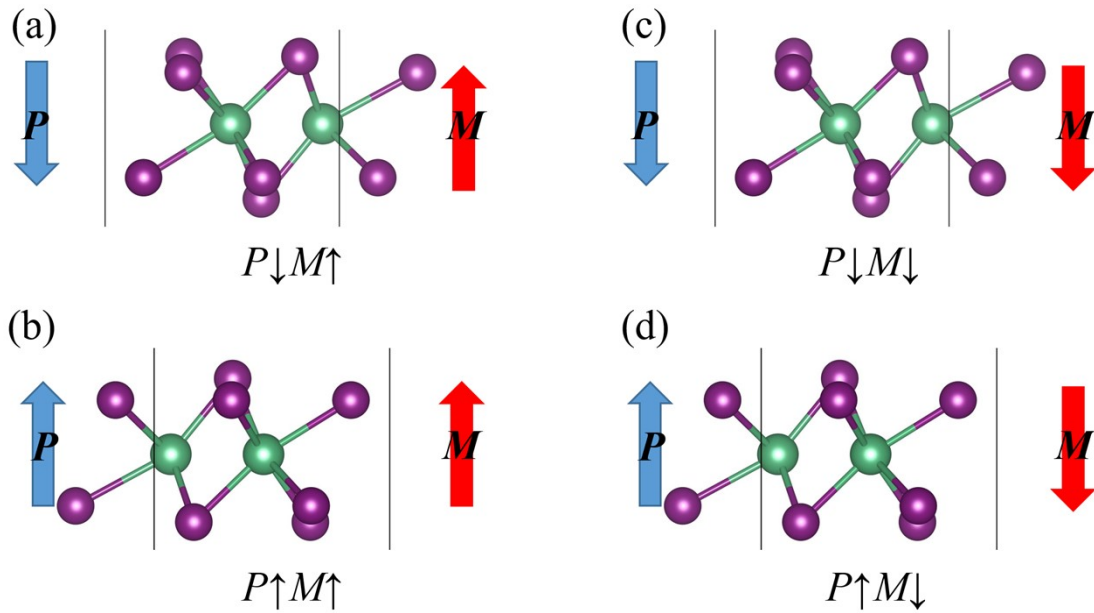

**Fig. S4** Four different FE/FM configurations of the  $\text{Nb}_3\text{I}_8$  monolayer: (a)  $P\downarrow M\uparrow$  configuration; (b)  $P\uparrow M\uparrow$  configuration; (c)  $P\downarrow M\downarrow$  configuration; (d)  $P\uparrow M\downarrow$  configuration. Blue and red arrows represent FE polarization and spin polarization directions, respectively.

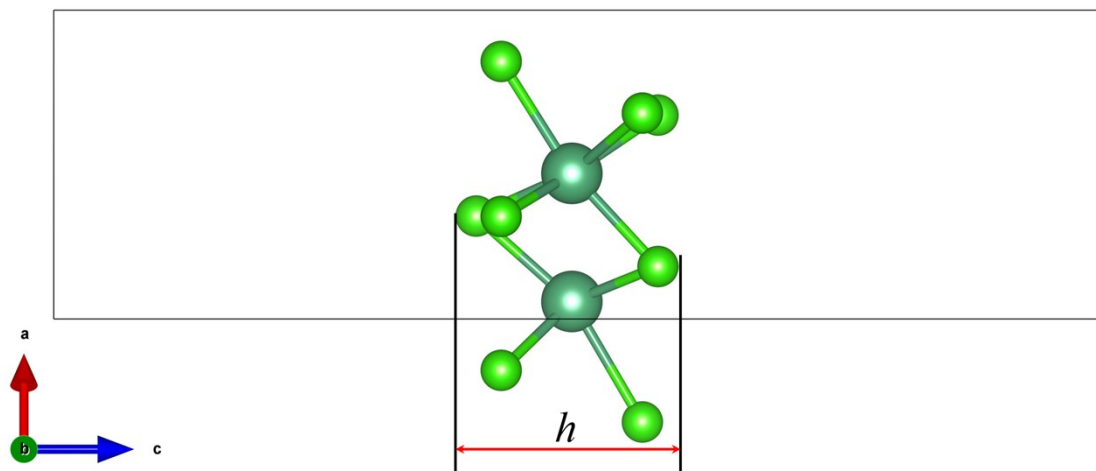

**Fig. S5** Side view of the  $\text{Nb}_3\text{Cl}_8$  monolayer with periodic boundaries indicated by a black rectangle.  $h$  is defined as the thickness of the monolayer and the vacuum region of 20 Å along  $c$  direction is

introduced in our calculations.

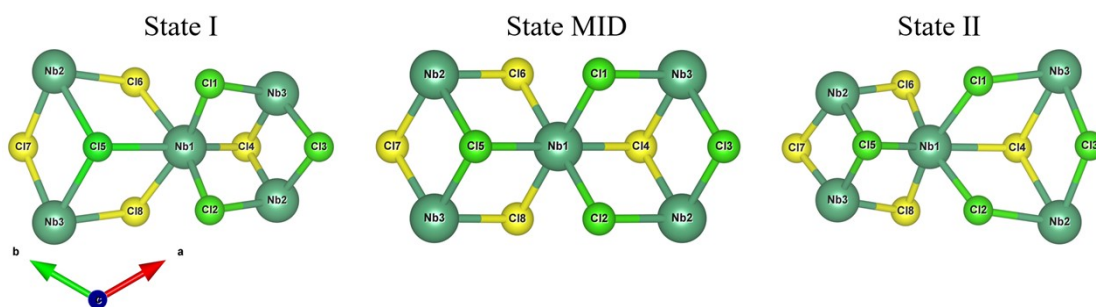

**Fig. S6** Top views of the  $\text{Nb}_3\text{Cl}_8$  monolayer for the State I, Stats MID and State II. The light green and yellow balls represent the Cl atoms at upper and bottom layers, respectively.

**Table S1.** Charge analysis of the  $\text{Nb}_3\text{Cl}_8$  monolayer by Hirshfeld method. The unit is  $e$ .

| Atoms                                   | State I | State MID | State II |
|-----------------------------------------|---------|-----------|----------|
| $\text{Cl}_1, \text{Cl}_2, \text{Cl}_3$ | -0.1089 | -0.1367   | -0.1587  |
| $\text{Cl}_5$                           | -0.1077 | -0.0843   | -0.0266  |
| $\text{Cl}_4$                           | -0.0226 | -0.0843   | -0.1077  |
| $\text{Cl}_6, \text{Cl}_7, \text{Cl}_8$ | -0.1587 | -0.1367   | -0.1089  |

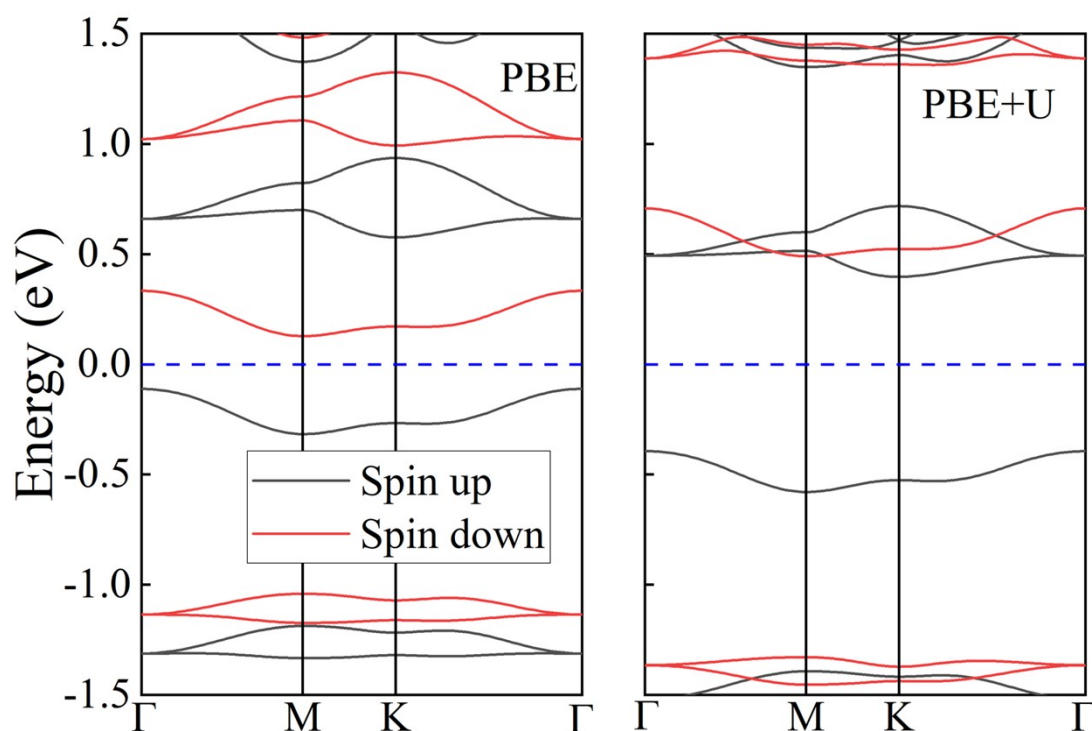

**Fig. S7** Band structures of the  $\text{Nb}_3\text{Cl}_8$  monolayers by PBE or PBE+U calculations.
